# Supplementary material for: Facile synthesis and gas-sensing performance of Sr- or Fe-doped In2O3 hollow sub-microspheres
Source: Royal Society of Chemistry journal article supplement (doi:10.1039/c5ra14052h), 2015-01-01
Supplement: c5ra14052h1.pdf [file c5ra14052h1.pdf]

Supporting Information for:

**Facile Synthesis and Gas-sensing Performance of Sr- or Fe-doped In<sub>2</sub>O<sub>3</sub> Hollow Sub-microspheres**

Xiaoping Shen<sup>a,\*</sup>, Lijun Guo<sup>a</sup>, Guoxing Zhu<sup>a</sup>, Chunyan Xi<sup>a</sup>, Zhenyuan Ji<sup>a,b</sup>, Hu  
Zhou<sup>b</sup>

*<sup>a</sup> School of Chemistry and Chemical Engineering, Jiangsu University, Zhenjiang  
212013, P. R. China*

*<sup>b</sup> School of Materials Science and Engineering, Jiangsu University, Zhenjiang 212013,  
P. R. China*

*\* Corresponding author. Tel/Fax: +86-511-88791800.*

*E-mail address: [xiaopingshen@163.com](mailto:xiaopingshen@163.com).*

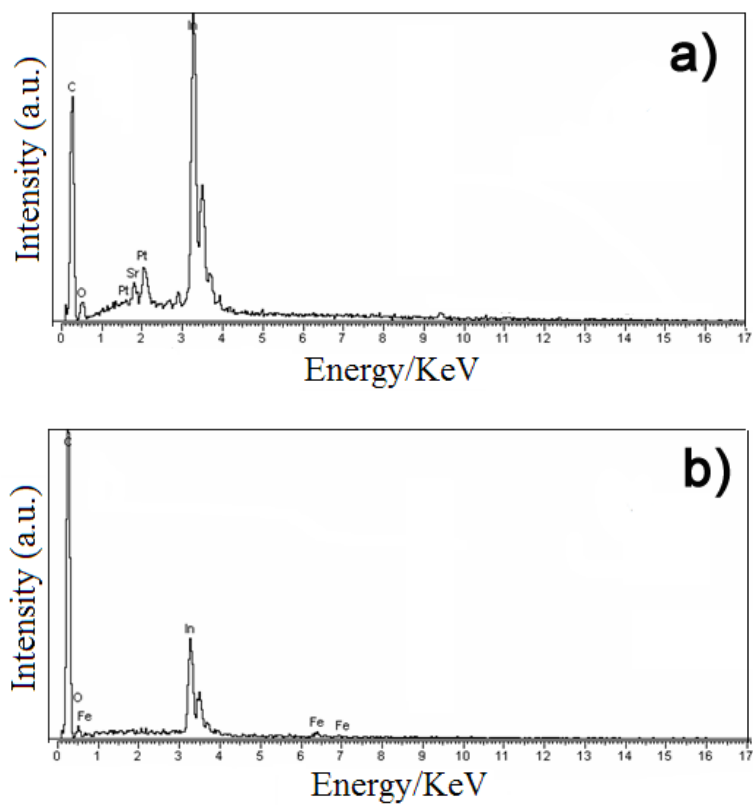

**Fig. SI-1** EDS spectra of a) Sr-doped  $\text{In}_2\text{O}_3$  and b) Fe-doped  $\text{In}_2\text{O}_3$ .

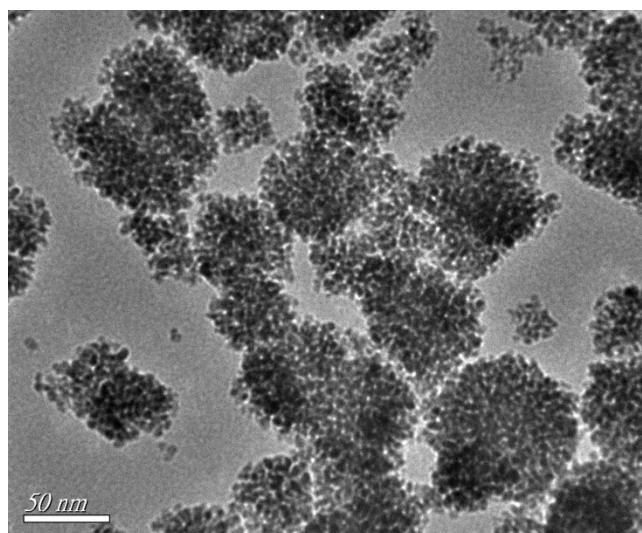

**Fig. SI-2** TEM image pure  $\text{In}_2\text{O}_3$  product obtained with similar route.

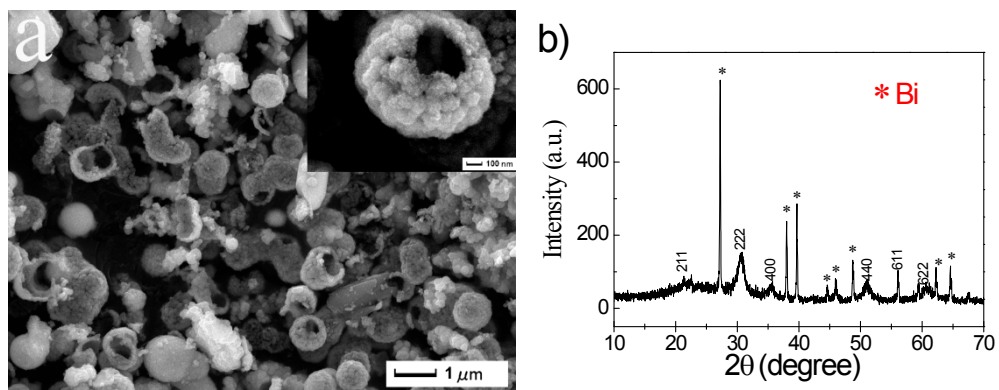

**Fig. SI-3** a) SEM image and b) XRD pattern of Bi-In<sub>2</sub>O<sub>3</sub> product.
